# Supplementary material for: Pseudotyping of VSV with Ebola virus glycoprotein is superior to HIV-1 for the assessment of neutralising antibodies
Source: PubMed Central journal article supplement (PMC7459353; doi:10.1038/s41598-020-71225-1), 2020-08-31
Supplement: 41598_2020_71225_MOESM1_ESM.pdf [file 41598_2020_71225_MOESM1_ESM.pdf]

## Supplementary Information

# Pseudotyping of VSV with Ebola virus glycoprotein is superior to HIV-1 for the assessment of neutralising antibodies

Kimberley Steeds<sup>1</sup>, Yper Hall<sup>1</sup>, Gillian S. Slack<sup>1</sup>, Stephanie Longet<sup>1</sup>, Thomas Strecker<sup>2</sup>, Sarah Katharina Fehling<sup>2</sup>, Edward Wright<sup>3</sup>, Joseph Akoi Bore<sup>4</sup>, Fara Raymond Koundouno<sup>5</sup>, Mandy Kader Konde<sup>6</sup>, Roger Hewson<sup>1</sup>, Julian A. Hiscox<sup>7</sup>, Georgios Pollakis<sup>7</sup> & Miles W. Carroll<sup>1,\*</sup>

<sup>1</sup>Public Health England (PHE), Porton Down, Salisbury, Wiltshire, UK.

<sup>2</sup>Institute of Virology, Philipps University Marburg, Marburg, Germany.

<sup>3</sup>School of Life Sciences, University of Sussex, Brighton, UK.

<sup>4</sup>Institut National de Santé Publique, Conakry, Republic of Guinea.

<sup>5</sup>University Julius Nyerere of Kankan, Conakry, Republic of Guinea.

<sup>6</sup>Centre d'Excellence de Formation et Recherche sur le Paludisme et les Maladies Prioritaires en Guinée (CEFORPAG), Ratoma, Conakry, Republic of Guinea.

<sup>7</sup>Institute of Infection and Global Health (IGH), University of Liverpool, Liverpool, UK.

\*Corresponding author.

miles.carroll@phe.gov.uk

## Background luminescence of cells only controls

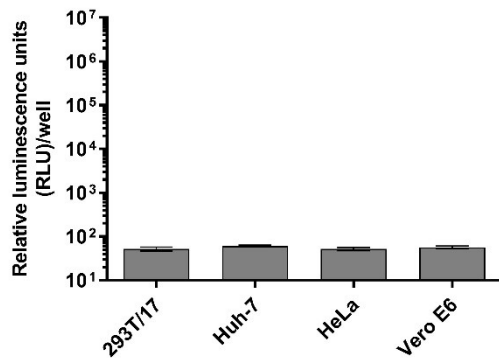

**Supplementary Figure S1.** Background luminescence of 293T/17, Huh-7, HeLa and Vero E6 cell lines. Error bars are one standard error above and below the mean, n = 8.

## Assessment of EBOV GP pseudotyped virus input for neutralisation

**Supplementary Table S1. Effect of EBOV (Mayinga) GP pseudotyped VSV input on neutralisation by anti-EBOV GP mAb, KZ52.** Percentage infectivity was calculated relative to pseudotyped virus only controls, and IC<sub>50</sub> of EBOV GP pseudotyped VSV neutralisation were estimated by model of nonlinear regression dose-response curves.

| EBOV GP pseudotyped VSV input (RLU/ml) | KZ52 IC <sub>50</sub> (µg/ml) | 95% CI     |
|----------------------------------------|-------------------------------|------------|
| 6.2 x 10 <sup>4</sup>                  | 0.08                          | 0.04, 0.17 |
| 3.9 x 10 <sup>4</sup>                  | 0.07                          | 0.03, 0.16 |
| 3.3 x 10 <sup>4</sup>                  | 0.03                          | 0.02, 0.05 |
| 2.0 x 10 <sup>4</sup>                  | 0.01                          | 0.01, 0.03 |

## Neutralisation of EBOV GP pseudotyped viruses by EVD survivor plasma

**Supplementary Table S2. Ebola virus disease (EVD) survivor samples tested in the EBOV GP pseudotyped virus neutralisation assays.** Plasma samples from EVD survivors of the 2013-2016 EBOV outbreak were obtained from a pre-existing biobank. Live EBOV (Mayinga) neutralisation data were available for each sample. IC = Inhibitory concentration (reciprocal dilution), GMT = Geometric mean titre.

| Sample | EBOV GP pseudotyped virus neutralisation |                  |                  |                  | Live EBOV neutralisation |
|--------|------------------------------------------|------------------|------------------|------------------|--------------------------|
|        | HIV-1                                    |                  | VSV              |                  |                          |
|        | IC <sub>50</sub>                         | IC <sub>80</sub> | IC <sub>50</sub> | IC <sub>80</sub> | GMT                      |
| G041   | 23.38                                    | 5.85             | 452.69           | 113.17           | 861                      |
| G048   | 6.28                                     | 1.57             | 191.72           | 47.93            | 724                      |
| G011   | 166.39                                   | 41.60            | 4787.00          | 1196.75          | 645                      |
| G037   | 68.73                                    | 17.18            | 645.00           | 161.25           | 609                      |
| G036   | 26.29                                    | 6.57             | 404.00           | 101.00           | 512                      |
| CS090  | 8.74                                     | 2.19             | 1106.00          | 276.50           | 362                      |
| CS053  | 16.76                                    | 4.19             | 959.00           | 239.75           | 256                      |
| G021   | 32.00                                    | 8.00             | 208.94           | 52.24            | 215                      |
| G035   | 3.70                                     | 0.93             | 69.00            | 17.25            | 215                      |
| G001   | 37.52                                    | 9.38             | 150.49           | 37.62            | 181                      |
| G014   | 18.47                                    | 4.62             | 408.00           | 102.00           | 181                      |
| G005   | 33.10                                    | 8.28             | 134.00           | 33.50            | 128                      |
| G045   | 12.25                                    | 3.06             | 70.18            | 17.55            | 108                      |
| G013   | 28.94                                    | 7.24             | 281.69           | 70.42            | 108                      |
| G025   | 246.85                                   | 61.71            | 98.81            | 24.70            | 91                       |
| G024   | 6.28                                     | 1.57             | 67.00            | 16.75            | 76                       |
| G044   | 40.85                                    | 10.21            | 179.00           | 44.75            | 76                       |
| G033   | 7.49                                     | 1.87             | 87.03            | 21.76            | 54                       |
| G028   | 1.60                                     | 0.40             | 263.00           | 65.75            | 54                       |
| G031   | 8.29                                     | 2.07             | 83.00            | 20.75            | 54                       |
| G018   | 9.93                                     | 2.48             | 52.00            | 13.00            | 54                       |
| G026   | 5.03                                     | 1.26             | 39.53            | 9.88             | 45                       |
| G038   | 33.46                                    | 8.37             | 123.00           | 30.75            | 45                       |
| G040   | 18.98                                    | 4.75             | 45.00            | 11.25            | 45                       |
| G020   | 6.10                                     | 1.53             | 182.00           | 45.50            | 45                       |
| G027   | 6.81                                     | 1.70             | 92.00            | 23.00            | 38                       |
| G019   | 6.28                                     | 1.57             | 23.00            | 5.75             | 38                       |
| CS084  | 106.72                                   | 26.68            | 106.00           | 26.50            | 38                       |
| G030   | 3.54                                     | 0.89             | 185.00           | 46.25            | 23                       |
| G022   | 4.01                                     | 1.00             | 20.00            | 5.00             | 6                        |

## Reproducibility of EBOV GP pseudotyped virus neutralisation

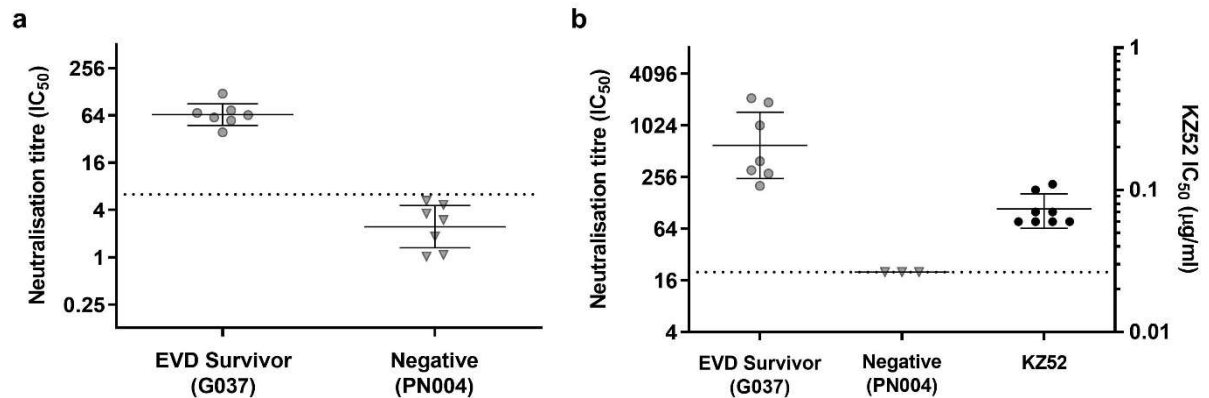

**Supplementary Figure S2.** Reproducibility of EBOV (Mayinga) GP pseudotyped (a) HIV-1 and (b) VSV neutralisation by control samples. The IC<sub>50</sub> of pseudotyped virus neutralisation were estimated by model of nonlinear regression dose-response curves. Data are shown for individuals and the geometric mean with 95% CI. Dotted lines represent background level of neutralisation. Background level of pseudotyped HIV-1 neutralisation (IC<sub>50</sub> 6.28 reciprocal dilution) is equal to UK negative control plasma mean plus two standard deviations, n = 7. Background level of pseudotyped VSV neutralisation is equal to the lowest dilution of sample tested in the assay (1/20).

## Neutralisation of EBOV GP pseudotyped virus and live EBOV by EVD survivor plasma

**Supplementary Table S3. Differences in neutralisation of EBOV GP pseudotyped virus and live EBOV by EVD survivor and negative plasma samples.**

| Mann-Whitney test                |                  | <i>p</i> value | U    | Difference between medians (95% CI) |
|----------------------------------|------------------|----------------|------|-------------------------------------|
| <b>EBOV GP pseudotyped virus</b> | <b>HIV-1 VSV</b> | 0.0054         | 60.5 | 8.6 (1.3, 25.4)                     |
| <b>Live EBOV</b>                 |                  | < 0.0001       | 5.5  | 128 (66, 243)                       |
|                                  |                  | < 0.0001       | 0.0  | 87 (49, 211)                        |

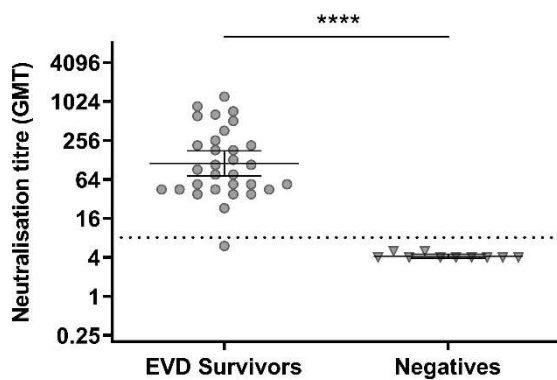

**Supplementary Figure S3.** Neutralisation of live EBOV (Mayinga) by EVD survivor and negative plasma samples. Data are shown for individuals and the geometric mean with 95% CI. Neutralisation titres were calculated as geometric mean titres (GMT) of four replicates. Dotted line represents background level of neutralisation. Seropositivity is defined by a GMT > 8. Statistically significant difference is highlighted (\*\*\*\* $p$  < 0.0001; Mann-Whitney).
